# Supplementary material
Source: PubMed Central journal article supplement (PMC4868670)
Supplement: NIHMS766375-supplement-1.pdf [file NIHMS766375-supplement-1.pdf]

## Supplemental Figure 1

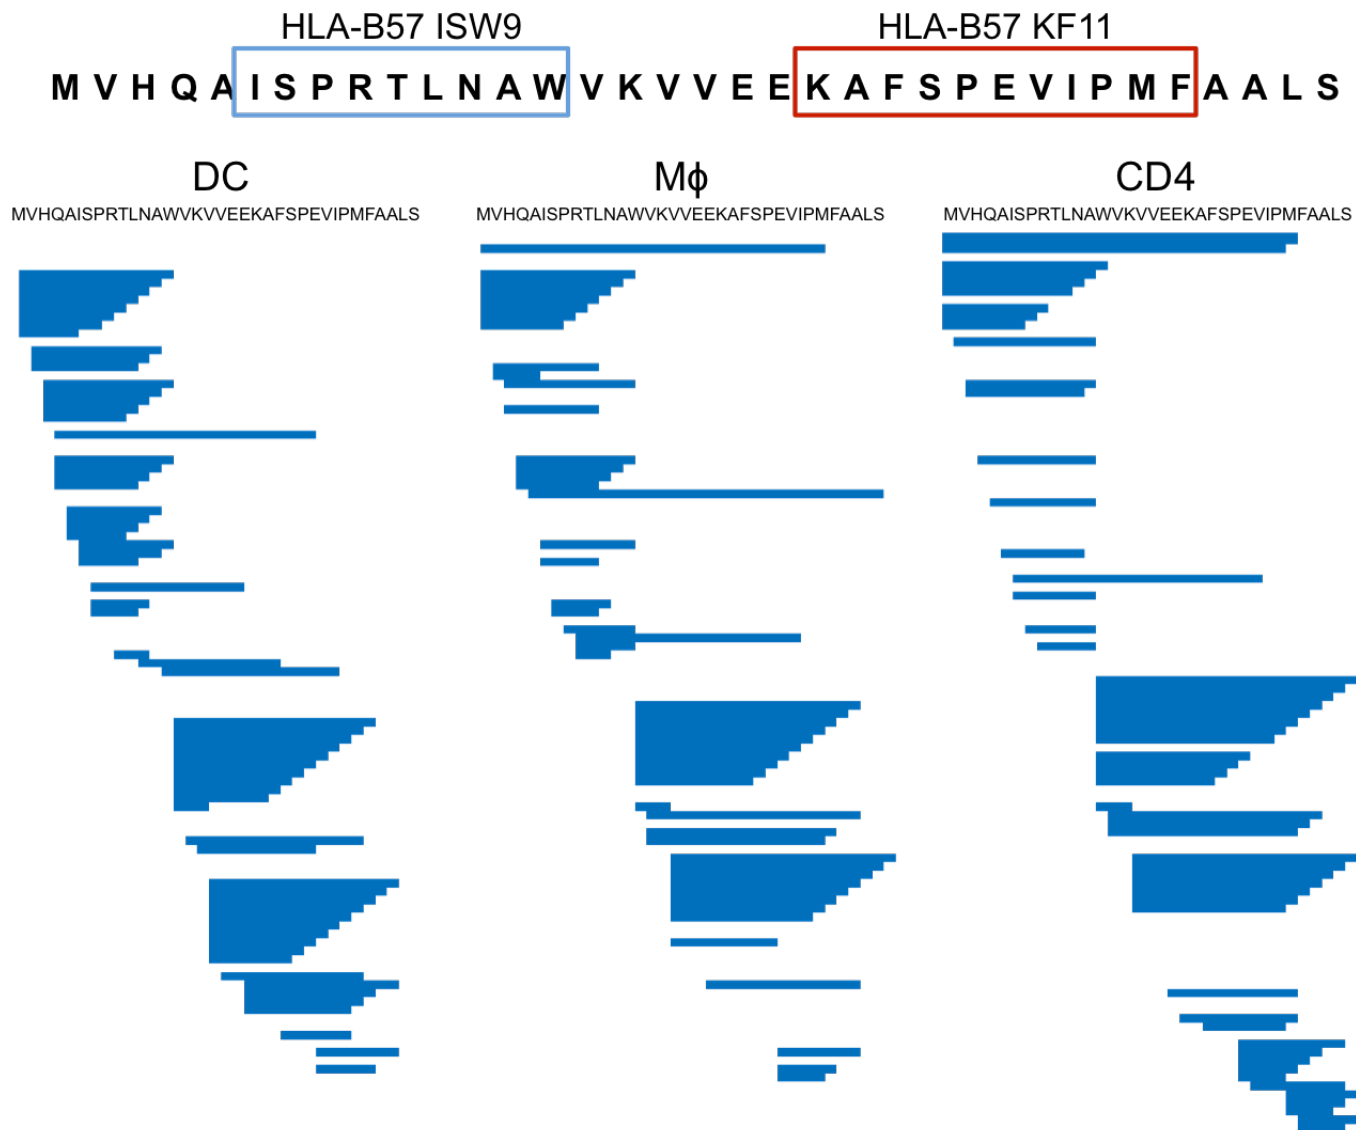

**Supplemental Figure 1. Variable Degradation Pattern in Dendritic Cells, Macrophages and CD4 T Cells.** HIV p24–35mer (MVHQAI SPRTLNAWVKVVEEKAFSPEVIMFAALS, aa 10–44 in Gag p24) was incubated at 37 degrees with DC, macrophage or CD4 T cell extracts for 60 minutes at pH4.0. Degradation products were analyzed by mass spectrometry and aligned to the original p24-35 sequence.

Supplemental Figure 2

DC

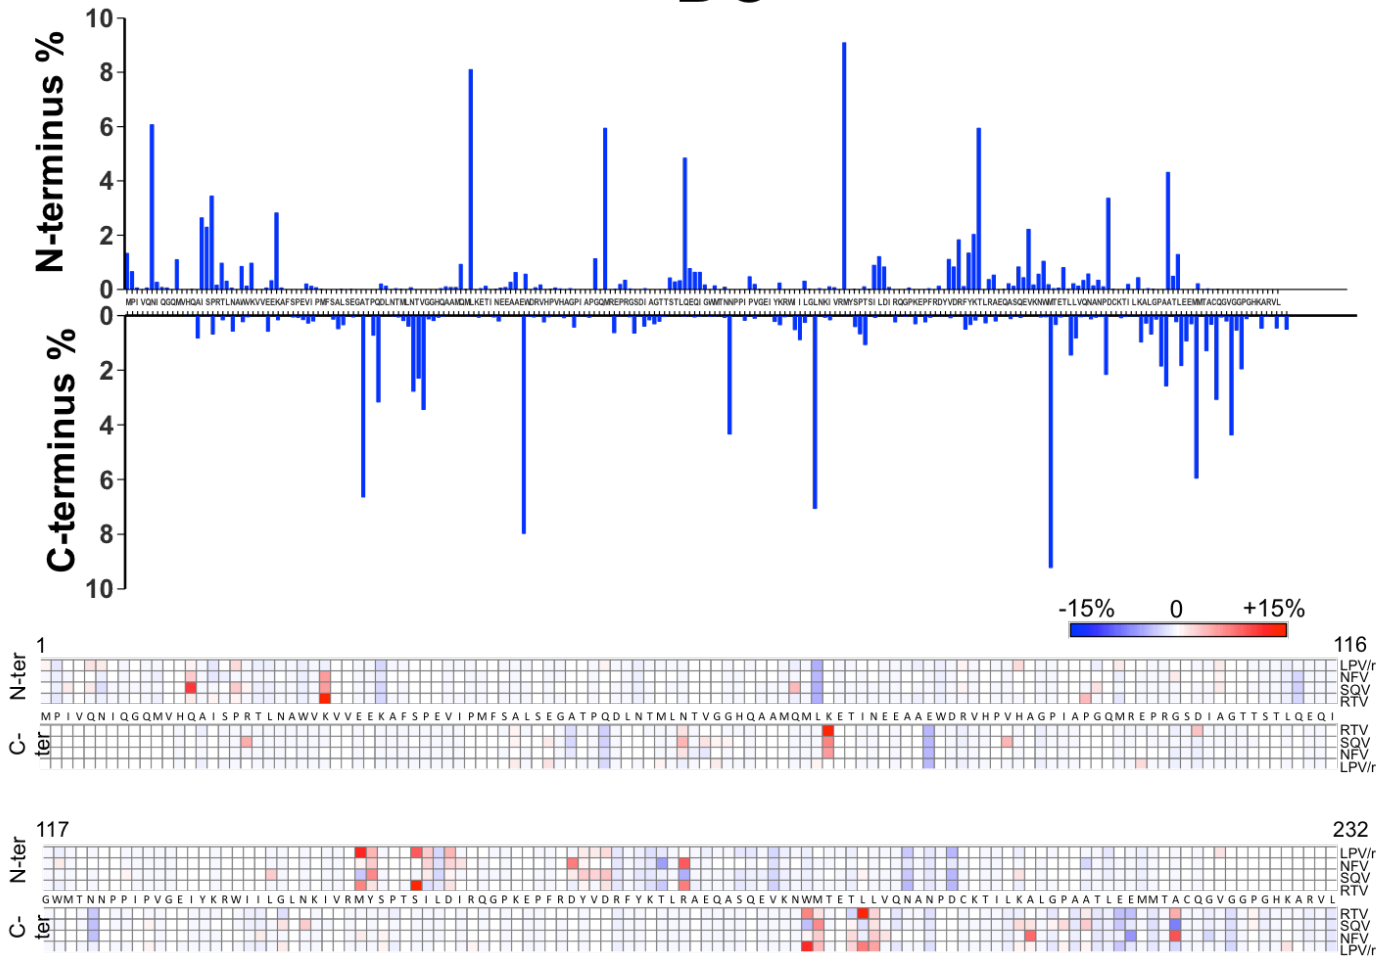

**Supplemental Figure 2. HIV PIs Alter HIV p24 Degradation Pattern.** Full HIV p24 protein was incubated at 37 degrees with DC extracts for 60 minutes at pH4.0. Degradation products were analyzed by LC-MS/MS and the contribution of the cleavage of each amino acid position (N-ter and C-ter) to the total intensity of all degradation products was quantified. The upper panel represents the cutting site intensity at each amino acid location of full HIV p24 protein by DC without PI treatment. The lower panel shows a heat map representing the difference in cutting intensity at each amino acid location of HIV full p24 protein by DCs treated with 5  $\mu$ M of different PIs compared to control.

### Supplemental Figure 3

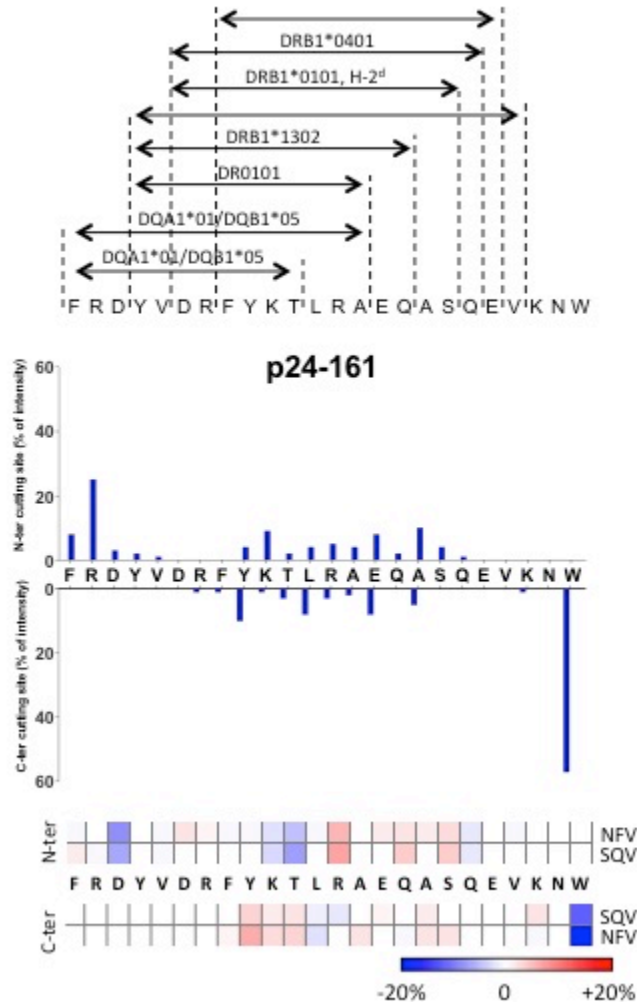

**Supplemental Figure 3. HIV PIs change p24-161 degradation patterns and epitope production in lysosomal compartments.** (Top panel) HIV p24-161 sequence with the known MHC-II epitope locations in this region. (Middle panel) Cleavage pattern of p24-161 incubated with DC cell extracts for 60 minutes at pH4.0. (Lower panel) Heat map representing the difference in cutting intensity at each amino acid location of p24-161 by DCs treated with 5  $\mu$ M of SQV or NFV compared to control. Data are representative of three independent experiments with three different donors' DCs analyzed by MS twice each.

# Supplemental Table 1

| Common Peptides                                                                                                                                                                                                                                                                                                      | Protein AC    | Proteins                                      | Common Peptides                                                                                    | Protein AC | Proteins                 | Common Peptides                | Protein AC | Proteins                                           |
|----------------------------------------------------------------------------------------------------------------------------------------------------------------------------------------------------------------------------------------------------------------------------------------------------------------------|---------------|-----------------------------------------------|----------------------------------------------------------------------------------------------------|------------|--------------------------|--------------------------------|------------|----------------------------------------------------|
| AVIQMTEQELK<br>EQNTLQELK<br>VEAVEQNTLQELK<br>VEQNTLQELK                                                                                                                                                                                                                                                              | Q9H299        | SH3 domain-binding glutamic acid-rich protein | EVGGEALGRLL<br>KVVNDEVGGEALG<br>KVVNDEVGGEALGRLL<br>KVVNDEVGGEALGRLL<br>LTPFEKSAVYALWG<br>VCLVAHFG |            |                          | LVSNIKFERVPLQ<br>P26599        |            | Poly(pyrimidine tract-binding protein 1            |
| KGNYAERVGAGAPVYM<br>KGNYAERVGAGAPVY                                                                                                                                                                                                                                                                                  | Q96KRS;Q16777 | Histone H2A                                   | VEYVGGGALGRLL<br>VHLTPEEKSAVYALWG<br>VHLTPEEKSAVYALWG                                              | P68871     | Hemoglobin subunit beta  | ATPFLVVRHQLIKT<br>P15954       |            | Cytochrome c oxidase subunit 7C                    |
| LGHLNWFPPF                                                                                                                                                                                                                                                                                                           | Q8Z90         | Otagelin                                      | WGVNDEVGGEA<br>WGVNDEVGGEALG<br>WGVNDEVGGEALGR<br>WGVNDEVGGEALGRLL                                 | P02042     | Hemoglobin subunit delta | INETGDEPFFQYK<br>P15104        |            | Glutamine synthetase                               |
| TEENPKM                                                                                                                                                                                                                                                                                                              | Q04760        | Lactoylglutathione lyase                      | KVVNDEVGGEALGRLL<br>P02042                                                                         |            | Hemoglobin subunit delta | IVNTNVPRAVSPDG<br>P14174       |            | Macrophage migration inhibitory factor             |
| ALKAAHHTHKE                                                                                                                                                                                                                                                                                                          | P68511        | Protein S100-A12                              | WGVNDEVGGEA<br>WGVNDEVGGEALG<br>WGVNDEVGGEALGR<br>WGVNDEVGGEALGRLL                                 | P02042     | Hemoglobin subunit delta | YDMNMAANVGVNNT<br>P14174       |            |                                                    |
| AAHLPAEFTPAVHASLKD<br>AAHLPAEFTPAVHASL<br>AAHLPAEFTPAVHASL<br>AAHLPAEFTPAVH<br>ASVSTVLSKYR<br>ASVSTVLSKYR<br>FLASVSTVLSKYR<br>KVGAAHAGEVGAELER<br>AAHLPAEFTPAVHASLKD<br>LASVSTVLSKYR<br>LYTLAAHLPAAEFTPAVHASLKD<br>PAEFTPAVHASLKD<br>PAVHASLKD<br>PWNFKLLSH<br>PWNFKLLSH<br>SVSTVLSKYR<br>FPAVHASLKD<br>VDFPWNFKLLSH | P69905        | Hemoglobin subunit alpha                      | WGVNDEVGGEA<br>WGVNDEVGGEALG<br>WGVNDEVGGEALGR<br>WGVNDEVGGEALGRLL<br>KVVNDEVGGEALGRLL<br>P02042   |            | Hemoglobin subunit delta | MAATGLEDQDGRS<br>P07399        |            | Plastin-3                                          |
| LVVVPWTFQ<br>LVVVPWTFQR<br>LVVVPWTFQRF<br>LVVVPWTFQRF<br>LVVVPWTFQRF<br>LVVVPWTFQRF<br>VDFPWNFKLLSH<br>VDFPWNFKLLSH<br>LVVVPWTFQRF<br>LVVVPWTFQRF<br>LVVVPWTFQRF<br>LVVVPWTFQRF                                                                                                                                      | P68871;P02042 | Hemoglobin subunit beta/delta                 | WGVNDEVGGEA<br>WGVNDEVGGEALG<br>WGVNDEVGGEALGR<br>WGVNDEVGGEALGRLL<br>KVVNDEVGGEALGRLL<br>P02042   |            | Hemoglobin subunit delta | MAADGDFRDKC<br>P09382          |            | Galectin-1                                         |
|                                                                                                                                                                                                                                                                                                                      |               |                                               |                                                                                                    |            |                          | NRPFSGDGNVDF<br>P07996         |            | Thrombospondin-1                                   |
|                                                                                                                                                                                                                                                                                                                      |               |                                               |                                                                                                    |            |                          | STCQDAANVGVNNT<br>P07737       |            | Profilin-1                                         |
|                                                                                                                                                                                                                                                                                                                      |               |                                               |                                                                                                    |            |                          | MGKSNVQDQWFS<br>P07399         |            | Cathepsin D                                        |
|                                                                                                                                                                                                                                                                                                                      |               |                                               |                                                                                                    |            |                          | ALPYNALGK<br>P06703            |            | Protein S100-A6                                    |
|                                                                                                                                                                                                                                                                                                                      |               |                                               |                                                                                                    |            |                          | GAGIANDHFVK<br>P04406          |            | Glyceraldehyde-3-phosphate dehydrogenase           |
|                                                                                                                                                                                                                                                                                                                      |               |                                               |                                                                                                    |            |                          | SWYDNEFGYSNR<br>P04406         |            | Glyceraldehyde-3-phosphate dehydrogenase           |
|                                                                                                                                                                                                                                                                                                                      |               |                                               |                                                                                                    |            |                          | SWYDNEFGYSNRVVD<br>P04406      |            | Glyceraldehyde-3-phosphate dehydrogenase           |
|                                                                                                                                                                                                                                                                                                                      |               |                                               |                                                                                                    |            |                          | SWYDNEFGYSNRVVDL<br>P04406     |            | Glyceraldehyde-3-phosphate dehydrogenase           |
|                                                                                                                                                                                                                                                                                                                      |               |                                               |                                                                                                    |            |                          | WYDNEFGYSNRVVDL<br>P04406      |            | Glyceraldehyde-3-phosphate dehydrogenase           |
|                                                                                                                                                                                                                                                                                                                      |               |                                               |                                                                                                    |            |                          | YDNEFGYSNRVVDL<br>P04406       |            | Glyceraldehyde-3-phosphate dehydrogenase           |
|                                                                                                                                                                                                                                                                                                                      |               |                                               |                                                                                                    |            |                          | YDNEFGYSNRVVDL<br>P04406       |            | Glyceraldehyde-3-phosphate dehydrogenase           |
|                                                                                                                                                                                                                                                                                                                      |               |                                               |                                                                                                    |            |                          | YDNEFGYSNRVVDL<br>P04406       |            | Glyceraldehyde-3-phosphate dehydrogenase           |
|                                                                                                                                                                                                                                                                                                                      |               |                                               |                                                                                                    |            |                          | ADDVWNPFCGVIL<br>P04075        |            | Fructose-bisphosphate aldolase A                   |
|                                                                                                                                                                                                                                                                                                                      |               |                                               |                                                                                                    |            |                          | APPGSAEAEVQAKQQA<br>P07388     |            | SH3 domain-binding glutamic acid-rich-like protein |
|                                                                                                                                                                                                                                                                                                                      |               |                                               |                                                                                                    |            |                          | IGLTFAPPSAEAEVQAKQQA<br>P07388 |            | SH3 domain-binding glutamic acid-rich-like protein |
|                                                                                                                                                                                                                                                                                                                      |               |                                               |                                                                                                    |            |                          | ELLNWNVA<br>P04406             |            | Unassigned                                         |
|                                                                                                                                                                                                                                                                                                                      |               |                                               |                                                                                                    |            |                          | IRGNSCHOTAPG<br>P04406         |            | Unassigned                                         |
|                                                                                                                                                                                                                                                                                                                      |               |                                               |                                                                                                    |            |                          | PAVAGHTLTA<br>P04406           |            | Unassigned                                         |
|                                                                                                                                                                                                                                                                                                                      |               |                                               |                                                                                                    |            |                          | VNDKPLDL<br>P04406             |            | Unassigned                                         |

| Unique to Control                                                                                                                                                           | Protein AC                                                                                                                                                                                                                       | Protein                                                                                                                                                                                                                                                                                                                                                                                                                                                                                                                                                                                                                                                                   | Unique to SQV                                                                                                                                                                                                                                                                                                                                                                                                                                                                                                                                                                                                                                                                                                                                             | Protein AC                                                                                                                                                                                                                       | Protein                                                                                                                                                                                                                          |                                                                                                                                                                                                                                                                                                                                                                                                                                                                                                                                                                                         |
|-----------------------------------------------------------------------------------------------------------------------------------------------------------------------------|----------------------------------------------------------------------------------------------------------------------------------------------------------------------------------------------------------------------------------|---------------------------------------------------------------------------------------------------------------------------------------------------------------------------------------------------------------------------------------------------------------------------------------------------------------------------------------------------------------------------------------------------------------------------------------------------------------------------------------------------------------------------------------------------------------------------------------------------------------------------------------------------------------------------|-----------------------------------------------------------------------------------------------------------------------------------------------------------------------------------------------------------------------------------------------------------------------------------------------------------------------------------------------------------------------------------------------------------------------------------------------------------------------------------------------------------------------------------------------------------------------------------------------------------------------------------------------------------------------------------------------------------------------------------------------------------|----------------------------------------------------------------------------------------------------------------------------------------------------------------------------------------------------------------------------------|----------------------------------------------------------------------------------------------------------------------------------------------------------------------------------------------------------------------------------|-----------------------------------------------------------------------------------------------------------------------------------------------------------------------------------------------------------------------------------------------------------------------------------------------------------------------------------------------------------------------------------------------------------------------------------------------------------------------------------------------------------------------------------------------------------------------------------------|
| AVDGEPLGRVSF                                                                                                                                                                | P62937                                                                                                                                                                                                                           | Peptidyl-prolyl cis-trans isomerase A                                                                                                                                                                                                                                                                                                                                                                                                                                                                                                                                                                                                                                     | AIVEALNGEVAQAQKAPLVLK                                                                                                                                                                                                                                                                                                                                                                                                                                                                                                                                                                                                                                                                                                                                     | Q99497                                                                                                                                                                                                                           | Protein DJ-1                                                                                                                                                                                                                     |                                                                                                                                                                                                                                                                                                                                                                                                                                                                                                                                                                                         |
| QNTLQELK                                                                                                                                                                    | Q9H299                                                                                                                                                                                                                           | SH3 domain-binding glutamic acid-rich-like protein 3                                                                                                                                                                                                                                                                                                                                                                                                                                                                                                                                                                                                                      | AIVEALNGEVAQAQKAPLVLDK                                                                                                                                                                                                                                                                                                                                                                                                                                                                                                                                                                                                                                                                                                                                    |                                                                                                                                                                                                                                  | Histone H2A                                                                                                                                                                                                                      |                                                                                                                                                                                                                                                                                                                                                                                                                                                                                                                                                                                         |
| SYGAGPVVCTQLNS                                                                                                                                                              | Q9RF9                                                                                                                                                                                                                            | RNA-binding protein 14                                                                                                                                                                                                                                                                                                                                                                                                                                                                                                                                                                                                                                                    | KGNVYERIGAGAPVY                                                                                                                                                                                                                                                                                                                                                                                                                                                                                                                                                                                                                                                                                                                                           | Q96KRS                                                                                                                                                                                                                           |                                                                                                                                                                                                                                  |                                                                                                                                                                                                                                                                                                                                                                                                                                                                                                                                                                                         |
| MAVFLCLSP                                                                                                                                                                   | Q8L0K7                                                                                                                                                                                                                           | N-acetylaspartylglutamate synthase A                                                                                                                                                                                                                                                                                                                                                                                                                                                                                                                                                                                                                                      | YVYAKDQKMPHPAPQ                                                                                                                                                                                                                                                                                                                                                                                                                                                                                                                                                                                                                                                                                                                                           | Q86AE4                                                                                                                                                                                                                           | Far upstream element-binding protein 1                                                                                                                                                                                           |                                                                                                                                                                                                                                                                                                                                                                                                                                                                                                                                                                                         |
| IEILNPKMA<br>IEILNPKMAT<br>IQKCDPPIK<br>FTPAVHASLKD<br>HLPAEFTPAVHASLKD<br>SPADKTNKAAWAG                                                                                    | Q04760<br>P69905                                                                                                                                                                                                                 | Lactoylglutathione lyase<br>Hemoglobin subunit alpha                                                                                                                                                                                                                                                                                                                                                                                                                                                                                                                                                                                                                      | AAHLPAEFTPAVHASLKD<br>DKLASVSTVLSKYR<br>GRVGAHAGEVGAELER<br>PADKTNKAAWAGVGAHAGEVGAELER<br>SPADKTNKAAWAGVGVG                                                                                                                                                                                                                                                                                                                                                                                                                                                                                                                                                                                                                                               | P69905                                                                                                                                                                                                                           | Hemoglobin subunit alpha                                                                                                                                                                                                         |                                                                                                                                                                                                                                                                                                                                                                                                                                                                                                                                                                                         |
| YVVPWTFQRF<br>EVGGEALGRLL<br>DIAVDGEPLGRVSF<br>DIAVDGEPLGRVSF<br>DIAVDGEPLGRVSF<br>VDFPWNFKLLSH<br>VDFPWNFKLLSH<br>LVVVPWTFQRF<br>LVVVPWTFQRF<br>LVVVPWTFQRF<br>LVVVPWTFQRF | P68871;P02042<br>P62937<br>P62899<br>P62314<br>P62158<br>P61604<br>P51553<br>P40925<br>P30101<br>P27797<br>P27348<br>P26447<br>P23528<br>P15554<br>P15104<br>P14174<br>P13796<br>P12544<br>P06396<br>P04406<br>Q043598<br>Q00754 | Hemoglobin subunit beta/delta<br>Peptidyl-prolyl cis-trans isomerase A<br>60S ribosomal protein L31<br>Small nuclear ribonucleoprotein Sm D1<br>Calmodulin<br>10 kDa heat shock protein, mitochondrial<br>Isocitrate dehydrogenase (NAD) subunit gamma<br>Malate dehydrogenase, cytoplasmic<br>Protein disulfide-isomerase A3<br>Calreticulin<br>14-3-3 protein theta<br>Protein S100-A1<br>Cellin-1<br>Cytochrome c oxidase subunit 7C<br>Glutamine synthetase<br>Macrophage migration inhibitory factor<br>Plastin-2<br>Granin A<br>Gelolin<br>Glyceraldehyde-3-phosphate dehydrogenase<br>2'-deoxyadenosine 5'-phosphate 1H hydrolase 1<br>Lysosomal alpha-mannosidase | TLAAHLPAEFTPAVH<br>TLAAHLPAEFTPAVHASLKD<br>VLSFADKTNKAAWAGVGAHAGEY<br>VTLAAHLPAEFTPAVHASLKD<br>PDVAVGNPKVKAHGKKVVG<br>PWTQRF<br>YVVPWTFQRF<br>KVVNDEVGGEAL<br>KVVNDEVGGEALGR<br>VDEGGEALGRLL<br>VHLTPEEKSAVTA<br>VHLTPEEKSAVYALWG<br>VTLAVGKVVNDEVGGEA<br>WGVNDEVGGEA<br>PDIAVDGEPLGRVSF<br>VNPVTFDIAVDGEPLGR<br>AIDPDGSDIERSMPEQTG<br>PAGDQAPRAVPL<br>DGPVYTPDKAPNVAVTR<br>VTRPKAPNVAVTR<br>IAVFKYAGKDG<br>LTDQFRESRISDTSAG<br>SDVLELTDQFRESRISDTG<br>SDVLELTDQFRESRISDTSAG<br>PVDLSKWSRSL<br>DVGQTVDFPHTATPK<br>DGPLAKHRESITKAVTKYTSK<br>ATPFLVVRHQLIKT<br>IVNTNVPRAVSPDG<br>MLDLNLI<br>RSPFYVYFINGKQK<br>SFLPVIR<br>FVNWIDSIQR<br>MQQLVQKQIFSP<br>FNSGKVDVAINDFPD<br>NEFGYSNRVVD<br>SWYDNEFGYSNRVVD<br>DAECPVEVETRNA<br>PGSKEAEVQAKQQA<br>IPGSKAEVQAKQ | P68871;P02042<br>P62937<br>P62899<br>P62314<br>P62158<br>P61604<br>P51553<br>P40925<br>P30101<br>P27797<br>P27348<br>P26447<br>P23528<br>P15554<br>P15104<br>P14174<br>P13796<br>P12544<br>P06396<br>P04406<br>Q043598<br>Q00754 | P68871;P02042<br>P62937<br>P62899<br>P62314<br>P62158<br>P61604<br>P51553<br>P40925<br>P30101<br>P27797<br>P27348<br>P26447<br>P23528<br>P15554<br>P15104<br>P14174<br>P13796<br>P12544<br>P06396<br>P04406<br>Q043598<br>Q00754 | Hemoglobin subunit beta/delta<br>Peptidyl-prolyl cis-trans isomerase A<br>60S ribosomal protein L30<br>Actin<br>Rho GDP-dissociation inhibitor 2<br>Protein S100-A11<br>Protein disulfide-isomerase A3<br>Phosphoethanolamine-binding protein 1<br>Colfin-1<br>Histone H2B type 1<br>Cytochrome c oxidase subunit 7C<br>Macrophage migration inhibitory factor<br>Poly (ADP-ribose) polymerase 1<br>Glutathione S-transferase P<br>Cathepsin G<br>Neutrophil elastase<br>Cathepsin D<br>Glyceraldehyde-3-phosphate dehydrogenase<br>NADH dehydrogenase (ubiquinone) iron-sulfur protein |
|                                                                                                                                                                             |                                                                                                                                                                                                                                  | Proteins uniquely represented in Control                                                                                                                                                                                                                                                                                                                                                                                                                                                                                                                                                                                                                                  |                                                                                                                                                                                                                                                                                                                                                                                                                                                                                                                                                                                                                                                                                                                                                           |                                                                                                                                                                                                                                  |                                                                                                                                                                                                                                  |                                                                                                                                                                                                                                                                                                                                                                                                                                                                                                                                                                                         |
|                                                                                                                                                                             |                                                                                                                                                                                                                                  |                                                                                                                                                                                                                                                                                                                                                                                                                                                                                                                                                                                                                                                                           |                                                                                                                                                                                                                                                                                                                                                                                                                                                                                                                                                                                                                                                                                                                                                           |                                                                                                                                                                                                                                  | Proteins uniquely represented in SQV                                                                                                                                                                                             |                                                                                                                                                                                                                                                                                                                                                                                                                                                                                                                                                                                         |

**Supplemental Table 1: Peptides eluted from SQV treated and untreated PBMCs and their protein of origin.** Top tables represent the peptides commonly present on treated and untreated PBMCs. Bottom left table presents peptides uniquely present on untreated PBMCs. Bottom middle table represents peptides uniquely present on SQV treated PBMCs. Blue cells are the proteins represented uniquely in control and pink proteins represented uniquely in SQV treatment.
